# Supplementary material for: Nanoparticles of cerium, iron, and silicon oxides change the metabolism of phenols and flavonoids in butterhead lettuce and sweet pepper seedlings
Source: Royal Society of Chemistry journal article supplement (doi:10.1039/d1en00262g), 2021-01-01
Supplement: d1en00262g1.pdf [file d1en00262g1.pdf]

**Table S1.** Concentration of phenolic compounds ( $\mu\text{g g}^{-1}$  FW) in lettuce seedlings exposed to metal/metalloid oxides nanoparticles, control plants were sprayed with deionized water.

| Phenolic compounds        | Treatment        |                                |                  |                 |
|---------------------------|------------------|--------------------------------|------------------|-----------------|
|                           | CeO <sub>2</sub> | Fe <sub>2</sub> O <sub>3</sub> | SiO <sub>2</sub> | Control         |
| 3,4-diOH-benzaldehyde     | 1508.9 ± 1191.4  | 2029.2 ± 116.5 *               | 1078.1 ± 303.4 * | 3384.6 ± 282.2  |
| caffeic acid              | 260.0 ± 201.5    | 387.6 ± 33.9                   | 413.5 ± 47.9     | 281.5 ± 77.1    |
| chlorogenic acid          | 540.4 ± 231.4    | 474.1 ± 60.9                   | 588.9 ± 112.0    | 462.2 ± 42.8    |
| cryptochlorogenic acid    | 375.3 ± 2.5      | 375.6 ± 3.4                    | 377.5 ± 4.8      | 379.0 ± 1.4     |
| ferulic acid              | 252.9 ± 40.2     | 239.2 ± 4.2 *                  | 230.9 ± 1.9 *    | 264.7 ± 8.0     |
| gallic acid               | 366.0 ± 167.2    | 494.1 ± 54.8 *                 | 381.8 ± 44.6     | 323.0 ± 42.7    |
| neochlorogenic acid       | 171.7 ± 4.0      | 165.4 ± 3.3 a                  | 163.3 ± 9.9      | 170.0 ± 7.2     |
| <i>p</i> -coumaric acid   | 6.096 ± 2.342    | 4.367 ± 1.091 *                | 6.324 ± 0.358    | 11.897 ± 3.539  |
| <i>p</i> -OH-benzaldehyde | 308.2 ± 249.7    | 479.5 ± 99.1                   | 342.1 ± 42.0     | 470.7 ± 77.2    |
| <i>p</i> -OH-benzoic acid | 892.4 ± 80.8     | 1081.9 ± 194.2                 | 931.9 ± 51.3     | 608.5 ± 335.6   |
| protocatechuic acid       | 5122.1 ± 4133.2  | 9805.4 ± 622.8                 | 4311.8 ± 1105.1  | 7871.8 ± 2218.9 |
| salicylic acid            | 133.22 ± 97.99   | 104.68 ± 20.24                 | 70.96 ± 23.65 *  | 148.40 ± 22.30  |
| vanillic acid             | 453.6 ± 371.9    | 804.9 ± 55.1 *                 | 343.1 ± 188.9    | 648.0 ± 67.1    |
| vanillin                  | 70.02 ± 52.47    | 91.45 ± 7.89 *                 | 46.12 ± 13.41 *  | 124.27 ± 6.94   |
| cinnamic acid             | 407.3 ± 146.2    | 1419.9 ± 374.6                 | 618.6 ± 347.2    | 1744.0 ± 1352.4 |
| sinapinic acid            | 14.56 ± 10.44    | 21.42 ± 10.09                  | 18.47 ± 6.56     | 30.05 ± 14.61   |

syringic acid

149.71 ± 126.52

168.81 ± 28.70

46.27 ± 20.88

113.11 ± 66.00

---

\*Denotes significant differences ( $p < 0.05$ ) from the unexposed control with comparisons performed by a paired samples  $t$  test. Each value represents the mean ± standard deviation

**Table S2.** Concentration of phenolic compounds ( $\mu\text{g g}^{-1}$  FW) in sweet pepper seedlings exposed to metal/metalloid oxides nanoparticles, control plants were sprayed with deionized water.

| Phenolic compounds        | Treatment        |                                |                  |                 |
|---------------------------|------------------|--------------------------------|------------------|-----------------|
|                           | CeO <sub>2</sub> | Fe <sub>2</sub> O <sub>3</sub> | SiO <sub>2</sub> | Control         |
| 3,4-diOH-benzaldehyde     | 208.4 ± 73.0     | 296.6 ± 124.0                  | 213.8 ± 79.2     | 207.2 ± 11.7    |
| caffeic acid              | 326.09 ± 449.66  | 114.09 ± 61.93                 | 76.58 ± 39.57    | 154.48 ± 110.40 |
| chlorogenic acid          | 74.1 ± 29.8      | 1769.6 ± 506.9 *               | 945.3 ± 181.9 *  | 141.0 ± 36.8    |
| cryptochlorogenic acid    | 407.5 ± 58.7     | 386.3 ± 12.8                   | 384.4 ± 2.3      | 386.7 ± 15.5    |
| ferulic acid              | 244.5 ± 12.1     | 244.6 ± 7.0 *                  | 244.5 ± 10.0     | 231.0 ± 1.9     |
| gallic acid               | 192.1 ± 7.1      | 208.2 ± 10.7                   | 221.2 ± 38.0     | 190.0 ± 6.6     |
| neochlorogenic acid       | 168.6 ± 8.0      | 212.9 ± 20.6 *                 | 190.3 ± 14.6 *   | 156.8 ± 5.5     |
| <i>p</i> -coumaric acid   | 3.56 ± 1.89      | 13.83 ± 10.76                  | 7.69 ± 3.14      | 25.63 ± 23.27   |
| <i>p</i> -OH-benzaldehyde | 50.19 ± 8.12     | 116.13 ± 96.96                 | 68.37 ± 58.41    | 43.27 ± 1.29    |
| <i>p</i> -OH-benzoic acid | 2375.7 ± 528.9   | 1791.6 ± 1517.0                | 2621.3 ± 65.3    | 2120.9 ± 647.2  |
| protocatechuic acid       | 195.4 ± 33.2 *   | 467.9 ± 444.8                  | 319.7 ± 283.4    | 45.74 ± 39.57   |
| salicylic acid            | 248.0 ± 41.9     | 196.2 ± 68.3                   | 156.1 ± 121.2    | 177.1 ± 36.5    |
| vanillic acid             | 126.4 ± 17.8     | 125.1 ± 80.4                   | 140.7 ± 21.7     | 105.3 ± 18.7    |
| vanillin                  | 17.03 ± 7.01     | 28.54 ± 13.87                  | 19.69 ± 8.35     | 21.24 ± 3.05    |
| cinnamic acid             | 28.97 ± 24.51    | 24.64 ± 18.83                  | 29.04 ± 24.95    | 14.20 ± 11.68   |
| sinapinic acid            | 136.12 ± 166.25  | 44.82 ± 58.93                  | 17.78 ± 16.87    | 74.31 ± 50.79   |

syringic acid

73.26 ± 19.70

51.16 ± 43.31

67.50 ± 10.06

73.76 ± 5.00

---

\*Denotes significant differences ( $p < 0.05$ ) from the unexposed control with comparisons performed by a paired samples  $t$  test. Each value represents the mean ± standard deviation

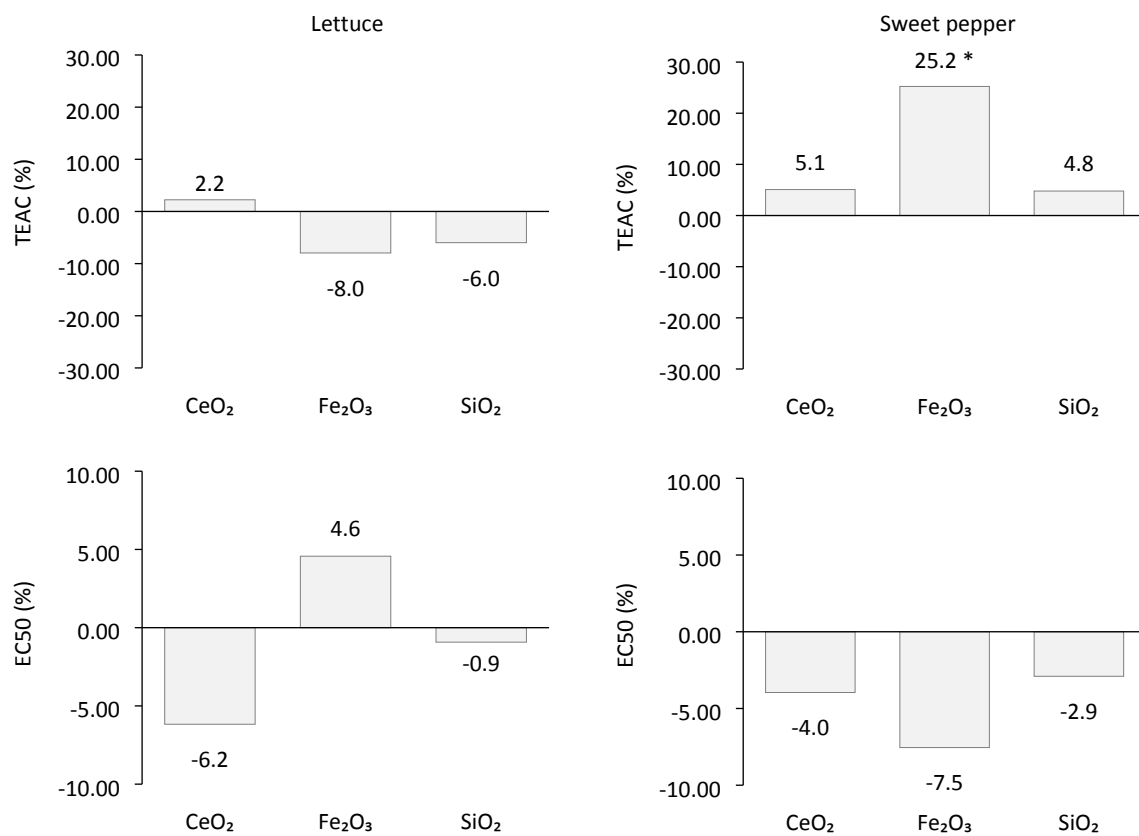

**Figure S1.** Percentage changes compared to controls in butterhead lettuce and sweet pepper seedlings in TEAC and EC<sub>50</sub> after treatment with metal oxide / metalloid nanoparticles, control plants were sprayed with deionized water; if inserted, (\*) indicates significant difference at  $p < 0.05$  between particular NPs treatment and the control group.

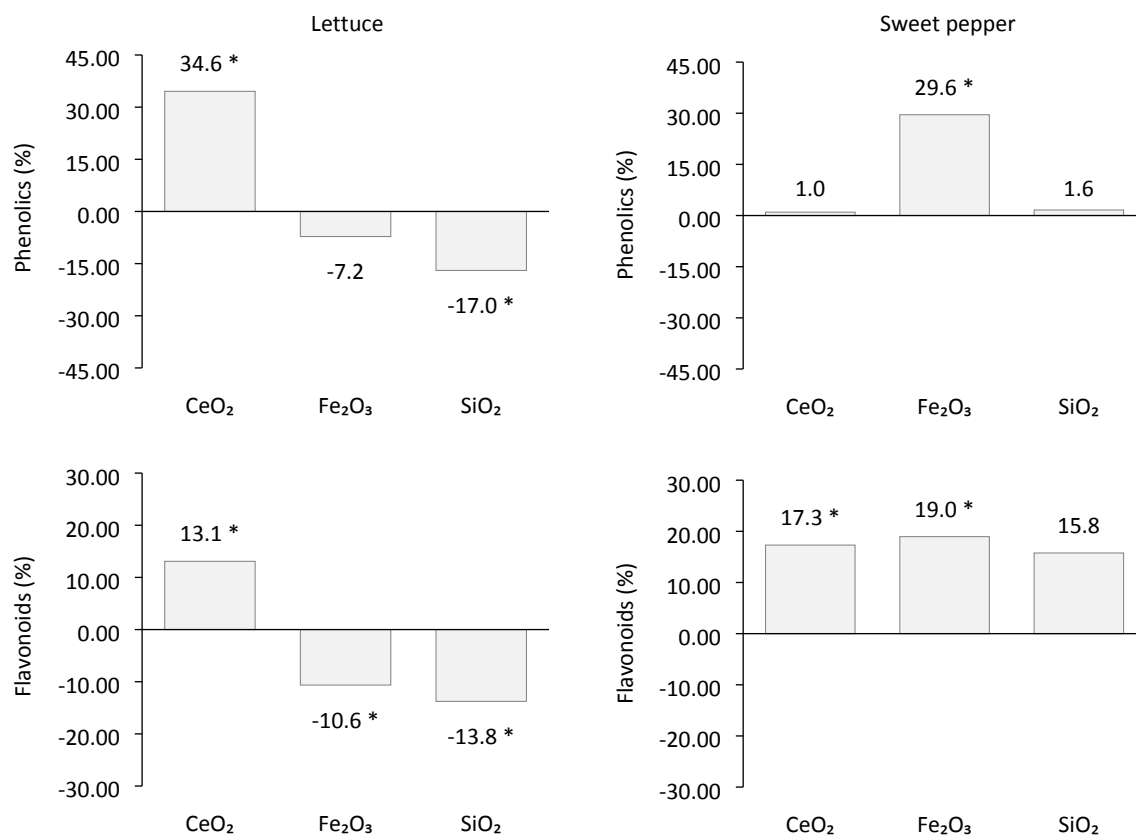

**Figure S2.** Percentage changes compared to controls in butterhead lettuce and sweet pepper seedlings in phenolics and flavonoids content after treatment with metal oxide / metalloid nanoparticles, control plants were sprayed with deionized water; if inserted, (\*) indicates significant difference at  $p < 0.05$  between particular NPs treatment and the control group.

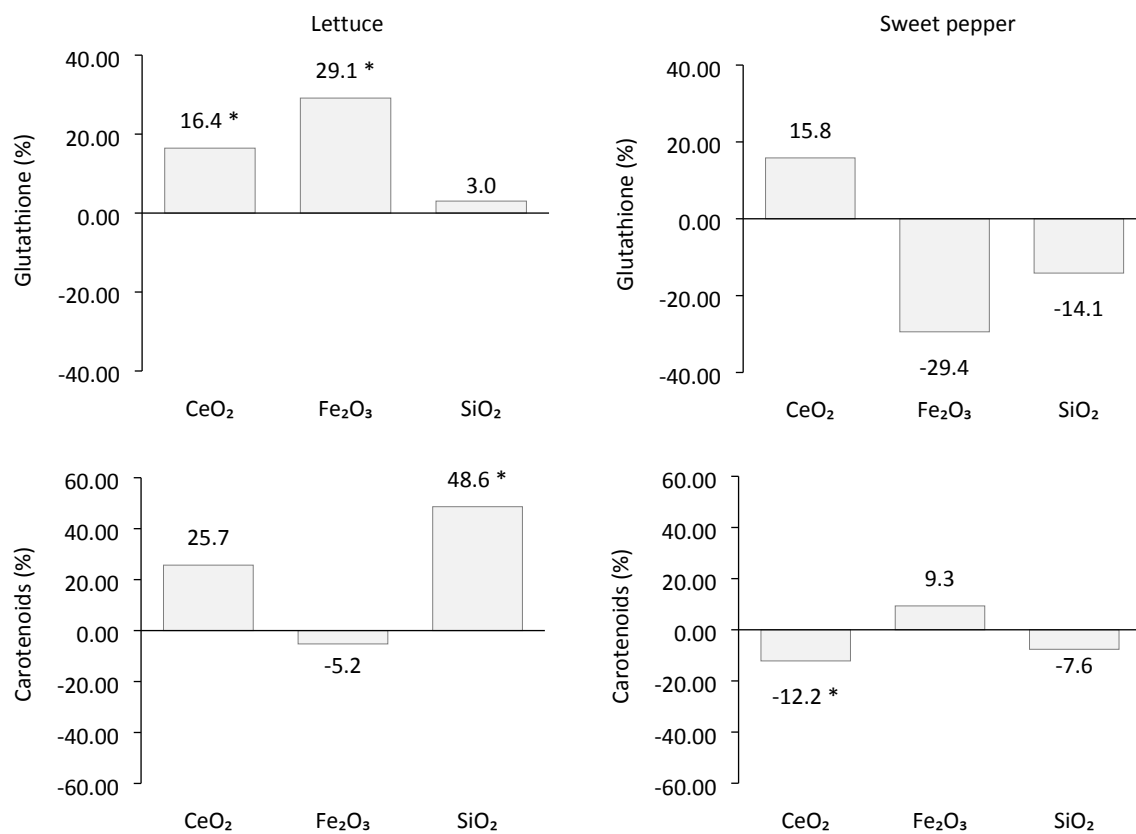

**Figure S3.** Percentage changes compared to controls in butterhead lettuce and sweet pepper seedlings in glutathione (GSH) and carotenoids content after treatment with metal oxide / metalloids nanoparticles, control plants were sprayed with deionized water; if inserted, (\*) indicates significant difference at  $p < 0.05$  between particular NPs treatment and the control group.

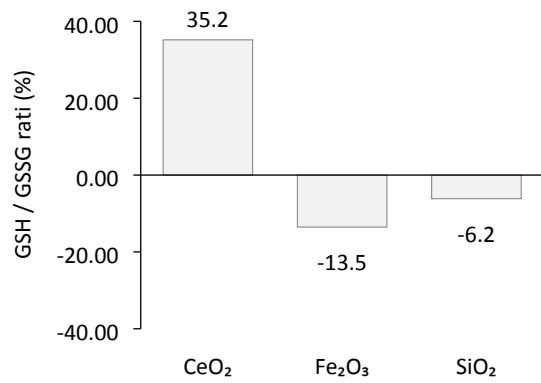

**Figure S4.** Percentage changes compared to controls in sweet pepper seedlings in GSH / GSSG ratio after treatment with metal oxide / metalloid nanoparticles, control plants were sprayed with deionized water; if inserted, (\*) indicates significant difference at  $p < 0.05$  between particular NPs treatment and the control group.



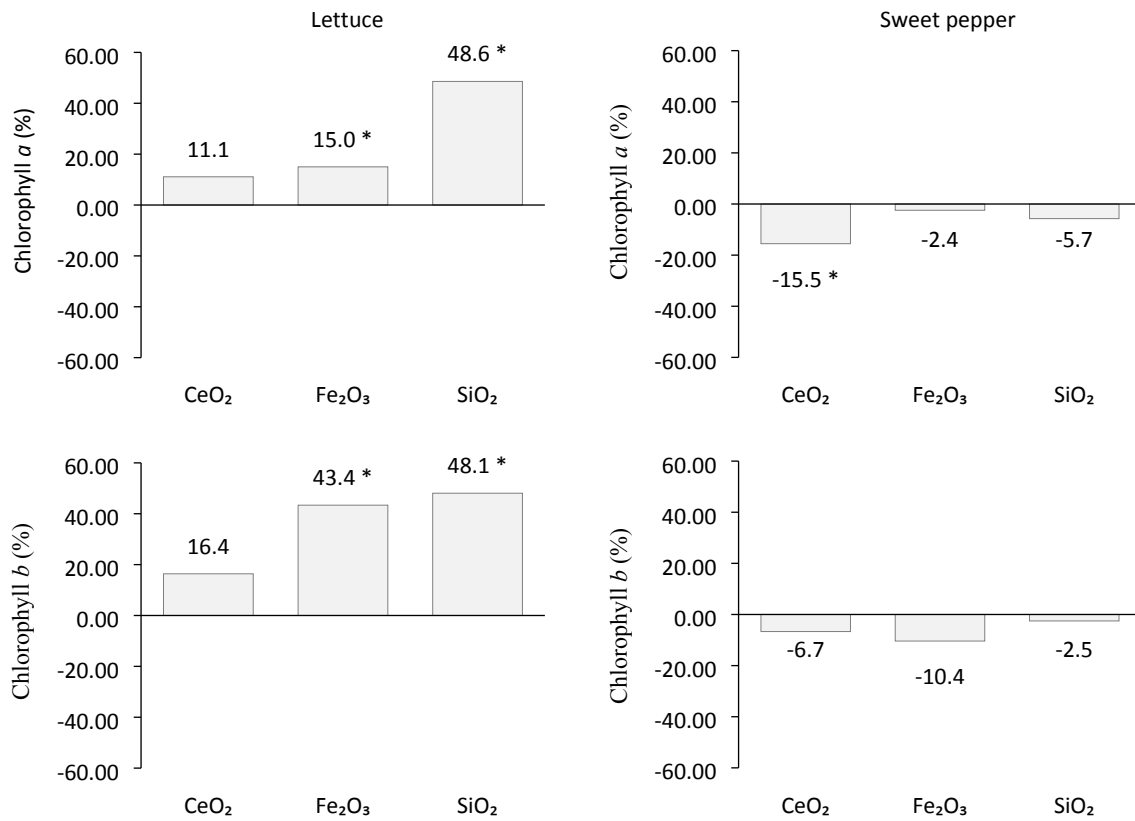

**Figure S5.** Percentage changes compared to controls in butterhead lettuce and sweet pepper seedlings in chlorophyll *a* and chlorophyll *b* content after treatment with metal oxide / metalloid nanoparticles, control plants were sprayed with deionized water; if inserted, (\*) indicates significant difference at  $p < 0.05$  between particular NPs treatment and the control group.

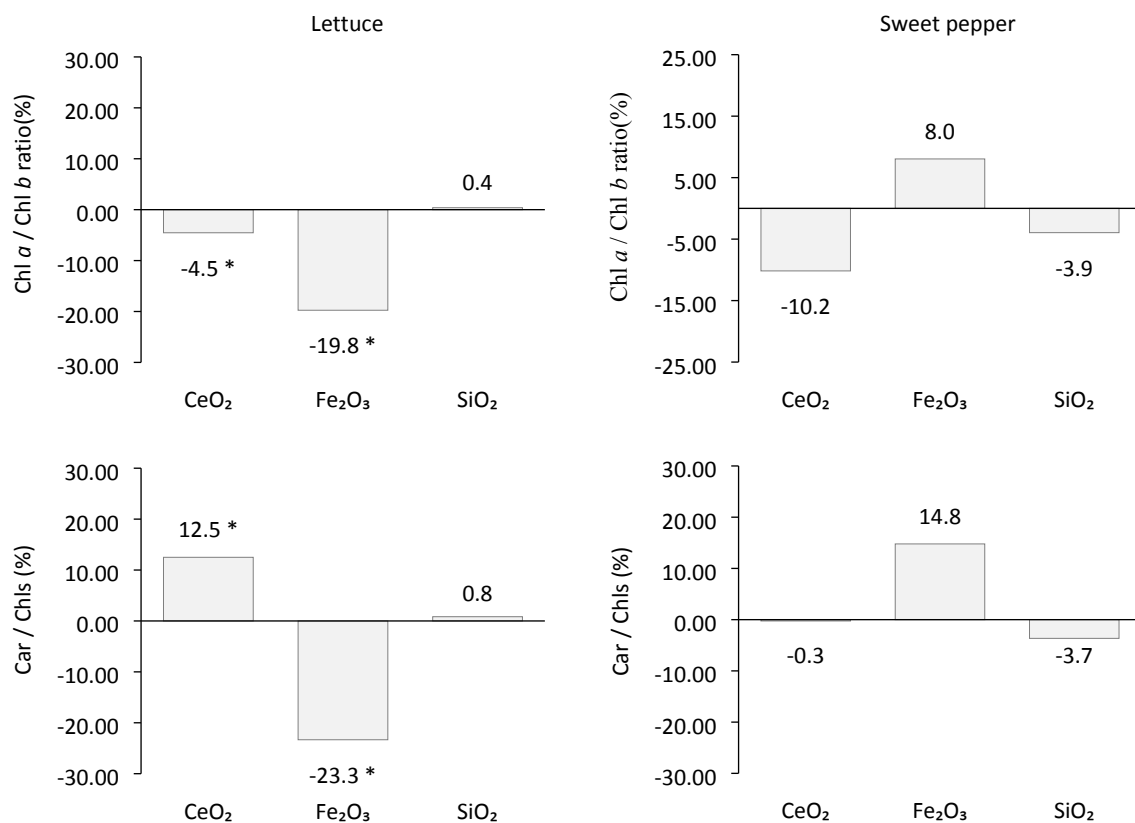

**Figure S6.** Percentage changes compared to controls in butterhead lettuce and sweet pepper seedlings in Chl *a* / Chl *b* ratio and Car / Chls ratio after treatment with metal oxide / metalloid nanoparticles, control plants were sprayed with deionized water; if inserted, (\*) indicates significant difference at  $p < 0.05$  between particular NPs treatment and the control group.
